# Supplementary material for: An ultrahigh volumetric capacitance of squeezable three-dimensional bicontinuous nanoporous graphene
Source: Royal Society of Chemistry journal article supplement (doi:10.1039/c5nr08852f), 2016-01-01
Supplement: c5nr08852f1.pdf [file c5nr08852f1.pdf]

## Supplementary Data

### Ultrahigh volumetric capacitance of squeezable three-dimensional bicontinuous nanoporous graphene

H.-J. Qiu,<sup>a,d</sup> L.Y. Chen,<sup>a</sup> Y. Ito,<sup>a</sup> J.L. Kang,<sup>a</sup> X.W. Guo,<sup>a</sup> P. Liu,<sup>a</sup> H. Kashani,<sup>a</sup> A. Hirata,<sup>a</sup> T. Fujita,<sup>a</sup>

M.W. Chen<sup>a,b,c,\*</sup>

<sup>a</sup>WPI Advanced Institute for Materials Research, Tohoku University, Sendai 980-8577, Japan

<sup>b</sup>State Key Laboratory of Metal Matrix Composites, School of Materials Science and Engineering, Shanghai Jiao Tong University, Shanghai 200030, China

<sup>c</sup>CREST, Japan Science and Technology Agency, Saitama 332-0012, Japan

<sup>d</sup>School of Chemistry and Chemical Engineering, Chongqing University, Chongqing 400044, China

\*Email: mwchen@wpi-aimr.tohoku.ac.jp

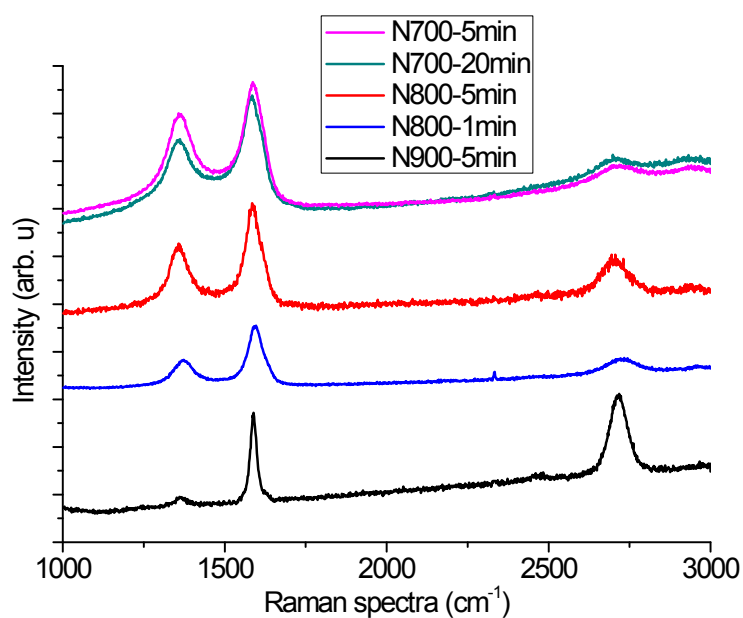

**Figure S1.** Raman spectra of the CVD-grown graphene samples with different CVD conditions.

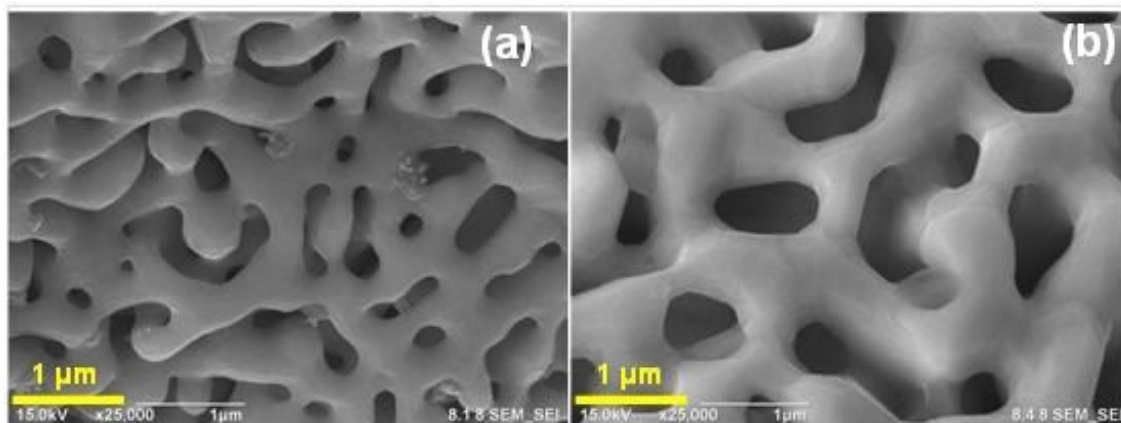

**Figure S2.** SEM micrographs of the np-graphene@np-Ni grown at: (a) 800 °C for 5 min; and (b) 900 °C 5 min).

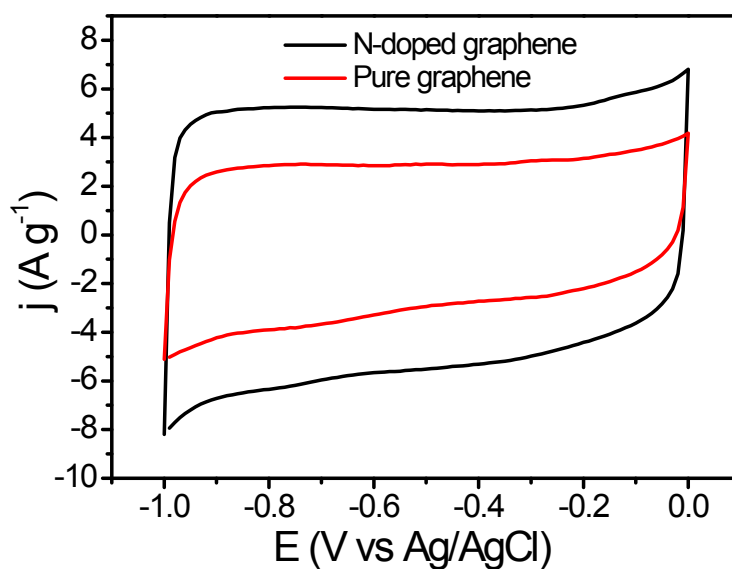

**Figure S3.** CV curves of the N-doped graphene and pure graphene grown at 800°C for 5 min. Scan rate: 100 mV s<sup>-1</sup>. The two samples have a similar pore size. The obvious current response is solely from the N-doping effect.

**Table S1.** Comparison of the volumetric capacitance of the N-doped nanoporous graphene with previously reported carbon-based materials.

| <b>Materials</b>                                 | <b><math>C_v</math> (F cm<sup>-3</sup>)</b> | <b>Electrolyte</b>                                              | <b>Reference</b> |
|--------------------------------------------------|---------------------------------------------|-----------------------------------------------------------------|------------------|
| <b>self-assembled porous monolithic graphene</b> | 376                                         | 6M KOH                                                          | 1                |
| <b>Low-temperature treated graphene</b>          | 470                                         | 6M KOH                                                          | 2                |
| <b>liquid-mediated dense graphene</b>            | ~250                                        | 1M H <sub>2</sub> SO <sub>4</sub>                               | 3                |
| <b>vacuum-assisted self-assembled graphene</b>   | 177                                         | (EMIM BF <sub>4</sub> ) in acetonitrile                         | 4                |
| <b>graphene/carbon nanotube composite</b>        | 165                                         | 1 M tetraethyl ammonium tetrafluoroborate (TEABF <sub>4</sub> ) | 5                |
| <b>seaweeds carbon</b>                           | 180                                         | 1M H <sub>2</sub> SO <sub>4</sub>                               | 6                |
| <b>ordered mesoporous carbon</b>                 | 107                                         | 6M KOH                                                          | 7                |
| <b>carbon sphere</b>                             | 170                                         | 1M KOH                                                          | 8                |
| <b>N-doped nanoporous graphene</b>               | ~300                                        | 2M KOH                                                          | This work        |

### References in Table S1

1. Tao, Y.; Xie, X. Y.; Lv, W.; Tang, D. M.; Kong, D. B.; Huang, Z. H.; Nishihara, H.; Ishii, T.; Li, B. H.; Golberg, D.; Kang, F. Y.; Kyotani, T.; Yang, Q. H. Towards Ultrahigh Volumetric Capacitance: Graphene Derived Highly Dense but Porous Carbons for Supercapacitors. *Sci. Rep.* 2013, 3, 2975.
2. Yan, J.; Wang, Q.; Wei, T.; Jiang, L.; Zhang, M.; Jing, X.; Fan, Z. Template-Assisted Low Temperature Synthesis of Functionalized Graphene for Ultrahigh Volumetric Performance Supercapacitors. *ACS Nano* 2014, 8, 4720-4729.

3. Yang, X. W.; Cheng, C.; Wang, Y. F.; Qiu, L.; Li, D. Liquid-Mediated Dense Integration of Graphene Materials for Compact Capacitive Energy Storage. *Science* 2013, 341, 534-537.
4. Ghaffari, M.; Zhou, Y.; Xu, H. P.; Lin, M. R.; Kim, T. Y.; Ruoff, R. S.; Zhang, Q. M. High-Volumetric Performance Aligned Nano-Porous Microwave Exfoliated Graphite Oxide-based Electrochemical Capacitors. *Adv. Mater.* 2013, 25, 4879-4885.
5. Jung, N.; Kwon, S.; Lee, D.; Yoon, D. M.; Park, Y. M.; Benayad, A.; Choi, J. Y.; Park, J. S. Synthesis of Chemically Bonded Graphene/Carbon Nanotube Composites and their Application in Large Volumetric Capacitance Supercapacitors. *Adv. Mater.* 2013, 25, 6854-6858.
6. Raymundo-Pinero, E.; Leroux, F.; Beguin, F. A High-Performance Carbon for Supercapacitors Obtained by Carbonization of a Seaweed Biopolymer. *Adv. Mater.* 2006, 18, 1877-1882.
7. Yu, X.; Wang, J.-g.; Huang, Z.-H.; Shen, W.; Kang, F. Ordered Mesoporous Carbon Nanospheres as Electrode Materials for High-Performance Supercapacitors. *Electrochem. Commun.* 2013, 36, 66-70.
8. Xia, X. H.; Shi, L.; Liu, H. B.; Yang, L.; He, Y. D. A Facile Production of Microporous Carbon Spheres and Their Electrochemical Performance in EDLC. *J. Phys. Chem. Solids* 2012, 73, 385-390.
